# Supplementary material for: Feasibility of Polyclonal Avian Immunoglobulins (IgY) as Prophylaxis against Human Norovirus Infection
Source: MDPI journal article supplement (doi:10.3390/v14112371), 2022-10-27
Supplement: s1 [file s1]

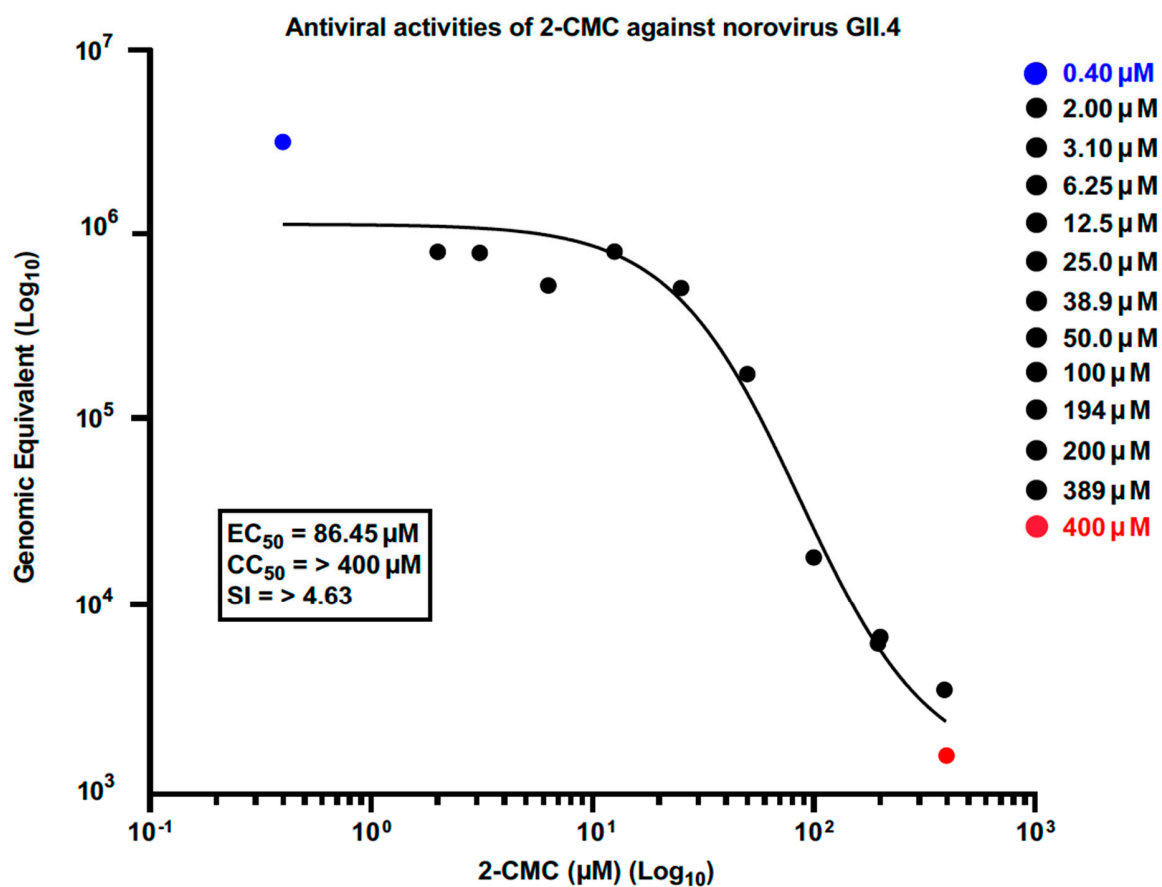

**Figure S1. Anti-norovirus activities of 2-CMC against HuNoV GII.4 on HIE J2 cells.** 2-CMC: 2'-C-methylcytidine, tested at a concentration range of 0.40  $\mu\text{M}$  – 400  $\mu\text{M}$ . EC<sub>50</sub>: 50% inhibition concentration; CC<sub>50</sub>: 50% cytotoxic concentration; SI: selectivity index presented as CC<sub>50</sub>/EC<sub>50</sub>.

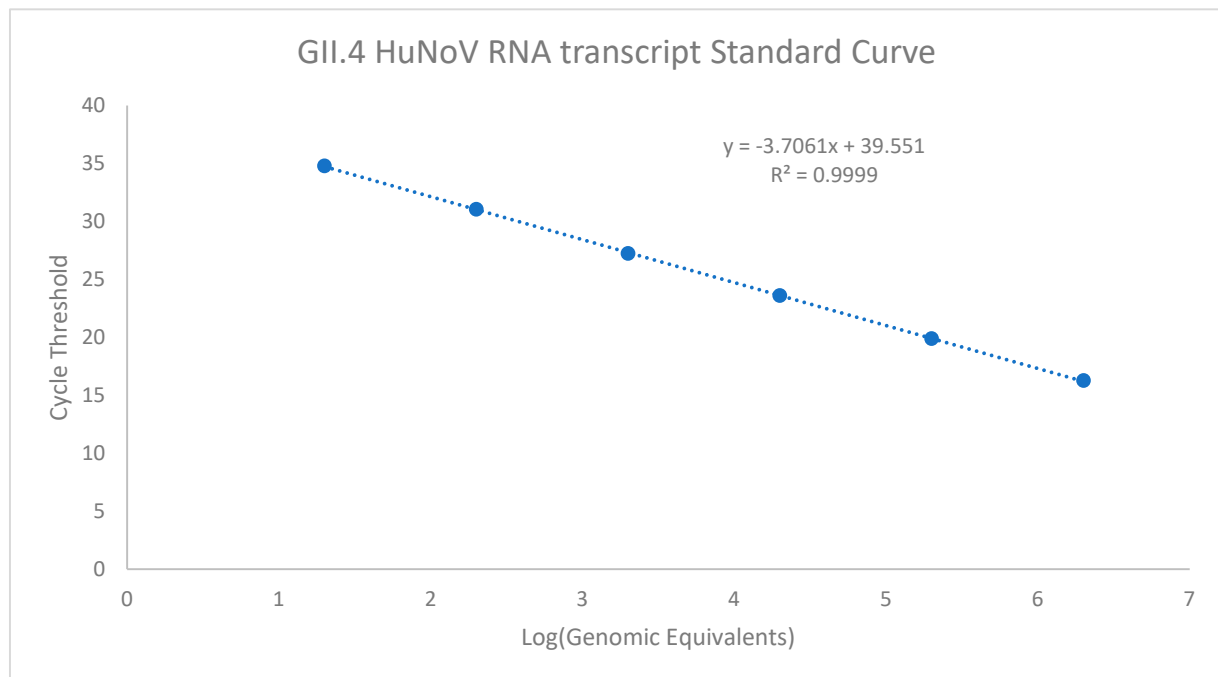

**Figure S2. HuNoV RNA transcript standard curve.**

The GII RNA transcript was generated following the method of Schwab K.J. et al 1997\* with the following modifications. The sequence between nucleotides 3839 and 5511 from GII.4 Houston virus (Hu/Houston/TCH186/2002/US; GenBank accession no. EU310927) was synthesized (Thermo-fisher GeneArt, USA) with a 5' flanking Asc I restriction site – T7 phage polymerase promoter region and a 3' SP6 polymerase promoter – Xho I flanking region. This synthetic insert was cloned into a pMA-7 (AmpR) vector (Thermo-fisher GeneArt, USA), heat-shock transformed into chemically competent E.coli TOP 10 (Thermo-fisher Invitrogen, USA), and then grown on 100 µg/mL Ampicillin selection LB plates for 17 hours at 37°C. Two growing colonies were picked for propagation in liquid selection culture to produce insert containing glycerol bacterial stocks. Sequence analysis on extracted propagated DNA plasmid verified sequence integrity. In vitro transcription was performed with linearized plasmid samples, using the T7 MEGAscript kit (Thermo-Fisher, USA) system with a 2 hour incubation followed by DNA template degradation with a TURBO DNase treatment. The high yield reaction products were purified using the MEGAClear (Thermo-Fisher, USA) clean-up kit to give high purity RNA. GII RNA transcript standard was brought to a final concentration of  $2 \times 10^{10}$  genomic equivalents/µL in 5 µL aliquots with RNA Storage Solution (Thermo-Fisher, USA) and stored at -80°C.

\*Schwab, K. J., M. K. Estes, et al. (1997). "Use of heat release and an internal RNA standard control in reverse transcription-PCR detection of Norwalk virus from stool samples." *J Clin Microbiol* **35**(2): 511-4.

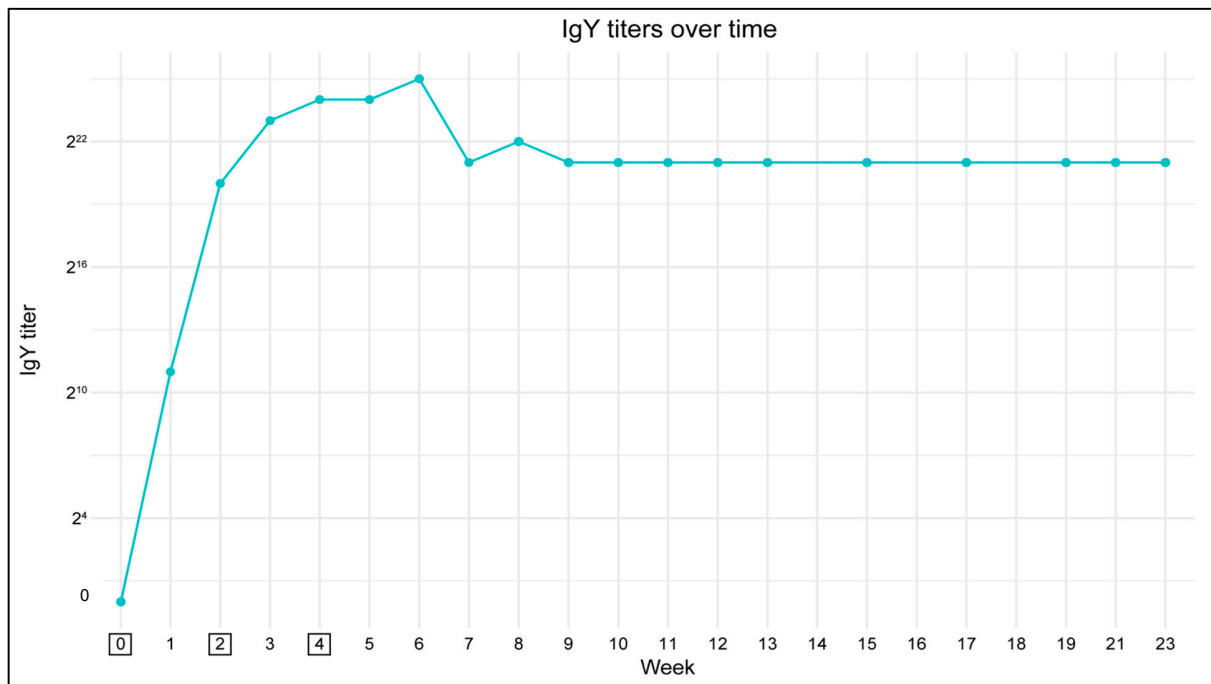

**Figure S3. IgY Titers Over Time Following Immunizations.** ELISA titers (log2) of IgY targeting HuNV GII.4 CHDC2094/1974 Virus-Like Particles (VLP) over 24 weeks are shown as a line plot. Immunizations were given at weeks 0, 2, and 4 (boxes). After seven weeks, HuNVLP IgY titers remained at or above  $2^{-21}$  (1:2,097,152) through the end of the study period. The lower limit of detection (LLOD) for this assay was 2.1 times the OD<sub>450</sub> value for the unimmunized control and defined as zero.

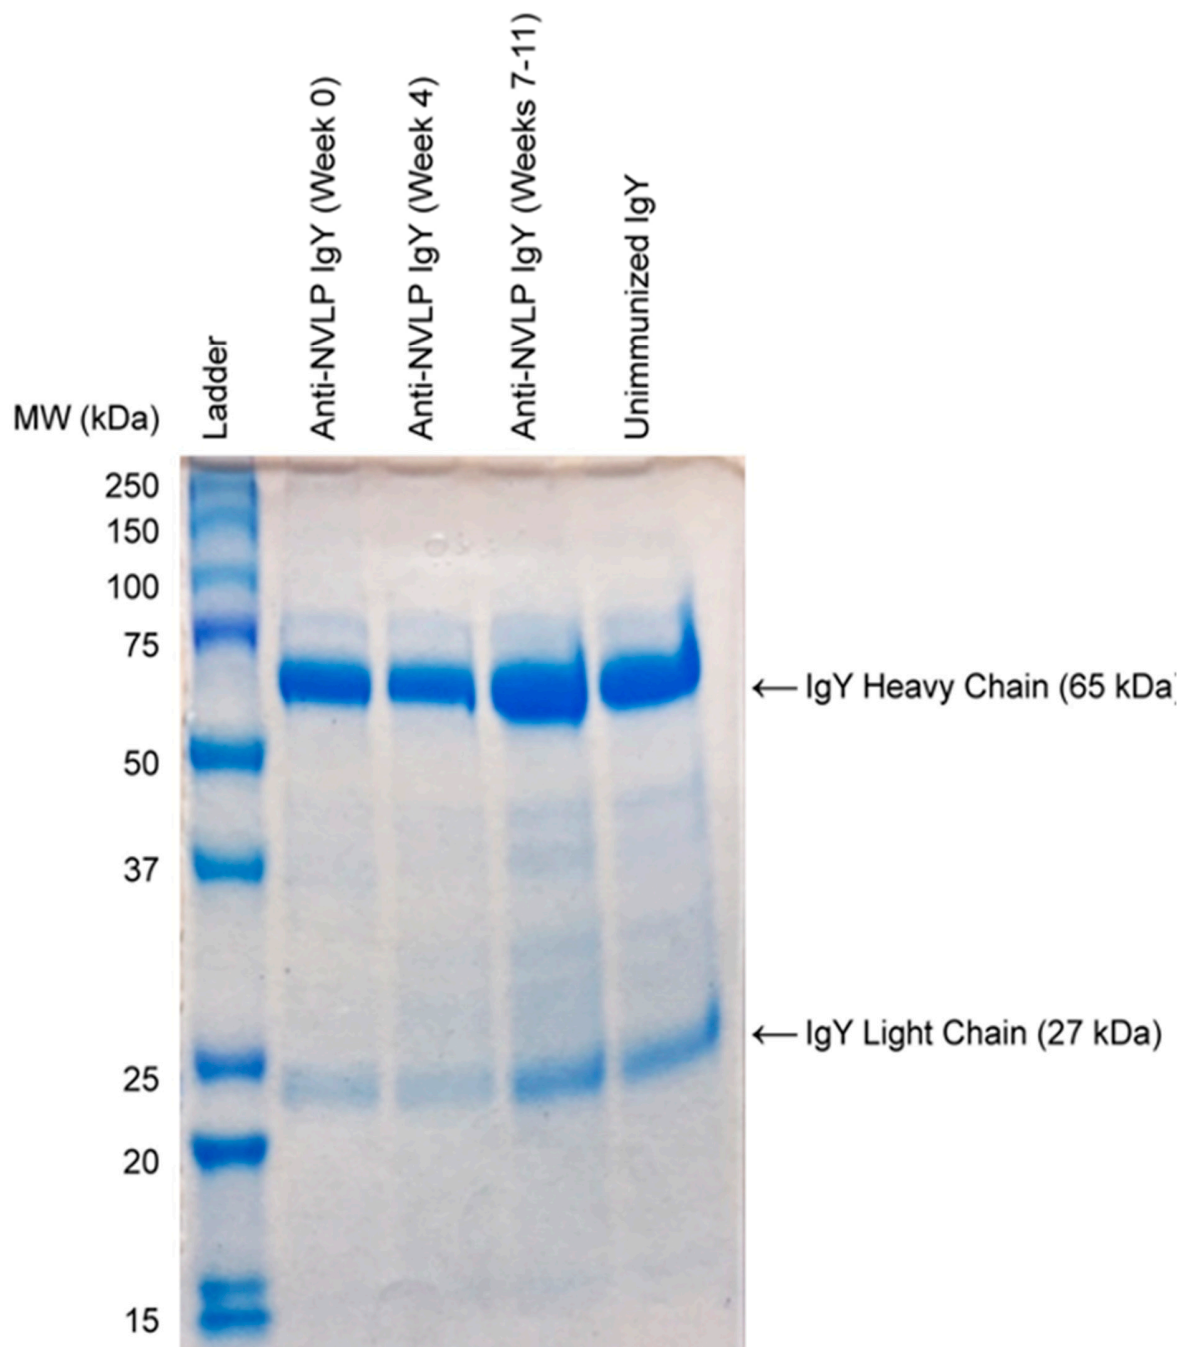

**Figure S4. SDS-PAGE Analysis of anti-HuNoV IgY.** SDS-Page Gel. Precision Plus Dual Color Pre-stained protein standard (10-250kDa; Bio-Rad, Hercules, CA, USA) was used as a molecular weight marker. Purified IgY from weeks 7-11 is pooled. IgY heavy and light chains show characteristic bands at 65 and 27 kDa, respectively. IgY from unimmunized hens was used as control.

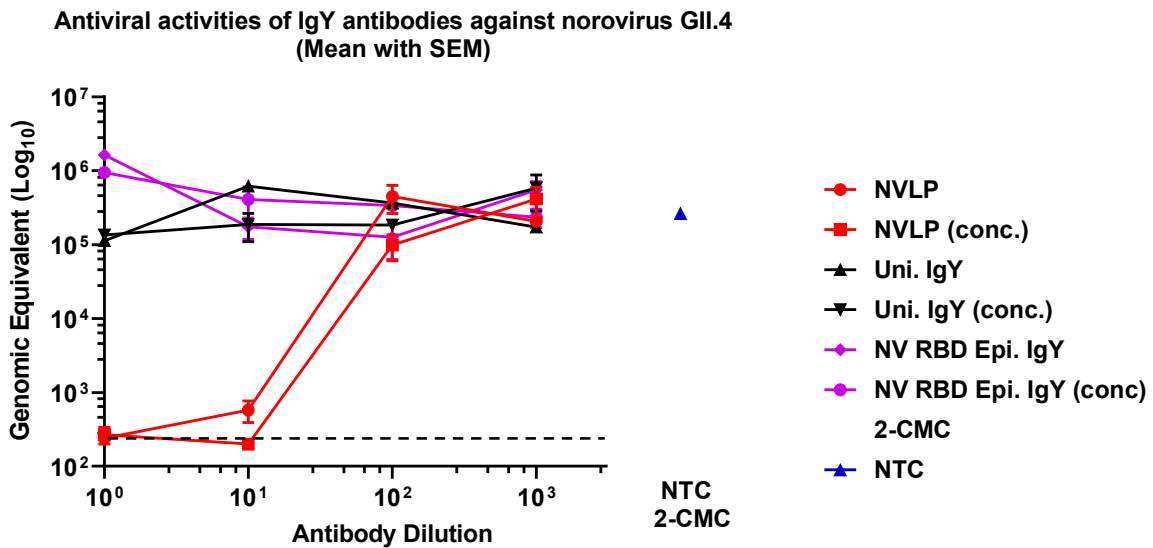

**Figure S5. Antiviral activities of IgY antibodies against HuNoV GII.4 in HIE J2 cells.**

Antibodies were made 10-fold serial dilutions. Antibodies tested are listed in Table 1. 2-CMC (2'-C-methylcytidine) was used as a positive drug control and tested at a concentration of 200  $\mu$ M. Dashed line indicates lower level of detection for HuNoV viral copies (200 genomic equivalents). NTC=non-treatment control (medium alone + virus) for virus growth in the cells. Limit of detection of the qRT-PCR  $2 \times 10^2$  genome equivalent. "Conc." indicates IgY preparations concentrated 2-fold over the original "neat" material at 10 mg IgY/mL. Concentrated IgY conditions and anti-RBD (receptor binding domain) IgY were dropped from subsequent experiments.

## Antiviral activities of IgY antibodies against norovirus GII.6

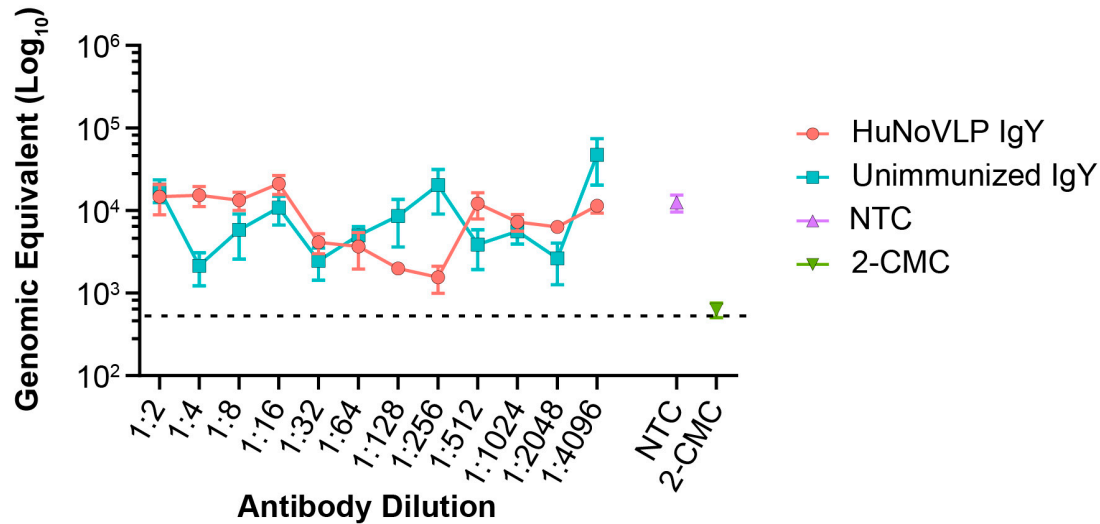

**Figure S6. Antiviral activities of IgY antibodies against HuNoV GII.6 in HIE J2 cells.**

Antibodies targeting HuNoV GII.4 VLP (HuNoVLP IgY) were prepared in 2-fold dilutions, along with antibodies from unimmunized hens' eggs (Unimmunized IgY). Dashed line indicates lower level of detection for HuNoV viral copies (200 genomic equivalents). 2-CMC (2'-C-methylcytidine) was used as a positive drug control and tested at a concentration of 200  $\mu$ M. NTC=non-treatment control (medium alone + virus) for virus growth in the cells.

**Table S1: Coefficients of Variation (CV) for Each Experiment****A) HBGA Blocking Assay (Figure 1)**

| <b>Test_Group</b> | <b>Dilution</b> | <b>mean</b> | <b>sd</b>  | <b>cv</b>  |
|-------------------|-----------------|-------------|------------|------------|
| anti-NVLP         | 1 to 1024       | 0.079       | 0.00264575 | 0.03349052 |
| anti-NVLP         | 1 to 128        | 0.04366667  | 0.00057735 | 0.01322176 |
| anti-NVLP         | 1 to 2048       | 0.10266667  | 0.00208167 | 0.02027597 |
| anti-NVLP         | 1 to 256        | 0.04533333  | 0.00416333 | 0.09183821 |
| anti-NVLP         | 1 to 512        | 0.048       | 0.0052915  | 0.11023964 |
| positive control  | 1 to 1024       | 0.15966667  | 0.0023094  | 0.01446389 |
| positive control  | 1 to 128        | 0.15966667  | 0.0023094  | 0.01446389 |
| positive control  | 1 to 2048       | 0.15966667  | 0.0023094  | 0.01446389 |
| positive control  | 1 to 256        | 0.15966667  | 0.0023094  | 0.01446389 |
| positive control  | 1 to 512        | 0.15966667  | 0.0023094  | 0.01446389 |
| unimmunized       | 1 to 1024       | 0.15166667  | 0.00737112 | 0.04860076 |
| unimmunized       | 1 to 128        | 0.135       | 0.00173205 | 0.01283001 |
| unimmunized       | 1 to 2048       | 0.16233333  | 0.00321455 | 0.01980216 |
| unimmunized       | 1 to 256        | 0.14766667  | 0.00737112 | 0.04991726 |
| unimmunized       | 1 to 512        | 0.15466667  | 0.01193035 | 0.07713591 |

**B) Viral Neutralization Assays – GII.4 (Figure 2A)**

| <b>Figure 2A</b>      |             |            |              |                        |             |           |              |
|-----------------------|-------------|------------|--------------|------------------------|-------------|-----------|--------------|
| <b>Anti-HuNoV IgY</b> |             |            |              | <b>Unimmunized IgY</b> |             |           |              |
| <b>Dilution</b>       | <b>Mean</b> | <b>SD</b>  | <b>CV</b>    | <b>Dilution</b>        | <b>Mean</b> | <b>SD</b> | <b>CV</b>    |
| 1:2                   | 200         | 0.000      | <b>0.000</b> | 1:2                    | 494826.8    | 86029.26  | <b>0.174</b> |
| 1:4                   | 219.25      | 38.500     | <b>0.176</b> | 1:4                    | 413966      | 262183.8  | <b>0.633</b> |
| 1:8                   | 200         | 0.000      | <b>0.000</b> | 1:8                    | 525246.3    | 102370.1  | <b>0.195</b> |
| 1:16                  | 200         | 0.000      | <b>0.000</b> | 1:16                   | 132590      | 61611.78  | <b>0.465</b> |
| 1:32                  | 397.25      | 239.451    | <b>0.603</b> | 1:32                   | 517473.8    | 18962.12  | <b>0.037</b> |
| 1:64                  | 588.25      | 95.925     | <b>0.163</b> | 1:64                   | 416350.5    | 204018.5  | <b>0.490</b> |
| 1:128                 | 44623.25    | 50100.819  | <b>1.123</b> | 1:128                  | 219343.8    | 132181.2  | <b>0.603</b> |
| 1:256                 | 354086.8    | 344929.594 | <b>0.974</b> | 1:256                  | 533215      | 32258.09  | <b>0.060</b> |
| 1:512                 | 894450      | 843208.666 | <b>0.943</b> | 1:512                  | 427616.5    | 254775.6  | <b>0.596</b> |
| 1:1024                | 478038.5    | 179205.021 | <b>0.375</b> | 1:1024                 | 865036.9    | 179919.8  | <b>0.208</b> |
| 1:2048                | 851238      | 337619.434 | <b>0.397</b> | 1:2048                 | 609085.1    | 304271.4  | <b>0.500</b> |
| 1:4096                | 51249.25    | 26825.643  | <b>0.523</b> | 1:4096                 | 370998.7    | 331818.1  | <b>0.894</b> |

C) Viral Neutralization Assays – GII.4 (Figure 2B)

| <b>Figure 2B</b>      |             |            |           |                        |             |            |           |
|-----------------------|-------------|------------|-----------|------------------------|-------------|------------|-----------|
| <b>Anti-HuNoV IgY</b> |             |            |           | <b>Unimmunized IgY</b> |             |            |           |
| <b>Dilution</b>       | <b>Mean</b> | <b>SD</b>  | <b>CV</b> | <b>Dilution</b>        | <b>Mean</b> | <b>SD</b>  | <b>CV</b> |
| 1:64                  | 206         | 16.971     | 0.082     | 1:64                   | 354753.8    | 248875.318 | 0.702     |
| 1:128                 | 515         | 126.636    | 0.246     | 1:128                  | 173418.167  | 147141.664 | 0.848     |
| 1:256                 | 12134.75    | 14242.380  | 1.174     | 1:256                  | 45045.8     | 46903.303  | 1.041     |
| 1:512                 | 82729.75    | 77981.536  | 0.943     | 1:512                  | 531833.833  | 625388.319 | 1.176     |
| 1:1024                | 72735.75    | 56488.241  | 0.777     | 1:1024                 | 295407.6    | 225973.766 | 0.765     |
| 1:2048                | 421439.75   | 578349.101 | 1.372     | 1:2048                 | 464040      | 656774.648 | 1.415     |
| 1:4096                | 373056      | 167943.867 | 0.450     | 1:4096                 | 174887      | 69837.262  | 0.399     |

D) Viral Neutralization Assays – GII.6 (Figure S6)

| <b>Figure S6</b>      |             |           |           |                        |             |           |           |
|-----------------------|-------------|-----------|-----------|------------------------|-------------|-----------|-----------|
| <b>Anti-HuNoV IgY</b> |             |           |           | <b>Unimmunized IgY</b> |             |           |           |
| <b>Dilution</b>       | <b>Mean</b> | <b>SD</b> | <b>CV</b> | <b>Dilution</b>        | <b>Mean</b> | <b>SD</b> | <b>CV</b> |
| 1:2                   | 14766       | 16726     | 1.133     | 1:2                    | 17981       | 13472     | 0.749     |
| 1:4                   | 15358       | 11849     | 0.771     | 1:4                    | 2154        | 2269      | 1.054     |
| 1:8                   | 13379       | 9399      | 0.703     | 1:8                    | 5816        | 7256      | 1.248     |
| 1:16                  | 21153       | 15524     | 0.734     | 1:16                   | 10843       | 10129     | 0.934     |
| 1:32                  | 4115        | 2768      | 0.673     | 1:32                   | 2472        | 2340      | 0.946     |
| 1:64                  | 3673        | 3420      | 0.931     | 1:64                   | 4998        | 3447      | 0.690     |
| 1:128                 | 1985        | 187       | 0.094     | 1:128                  | 8613        | 11185     | 1.299     |
| 1:256                 | 1553        | 1118      | 0.720     | 1:256                  | 20266       | 27449     | 1.354     |
| 1:512                 | 12169       | 10412     | 0.856     | 1:512                  | 3887        | 4817      | 1.239     |
| 1:1024                | 7297        | 4647      | 0.637     | 1:1024                 | 5613        | 4084      | 0.728     |
| 1:2048                | 6346        | 1275      | 0.201     | 1:2048                 | 2641        | 3076      | 1.164     |
| 1:4096                | 11481       | 6249      | 0.544     | 1:4096                 | 47305       | 65883     | 1.393     |
